# Supplementary material for: The effect of dietary interventions on pain and quality of life in women diagnosed with endometriosis: a prospective study with control group
Source: PubMed Central journal article supplement (PMC10754387; doi:10.1093/humrep/dead214), 2023-10-24
Supplement: dead214_supplementary_table_s1.pdf [file dead214_supplementary_table_s1.pdf]

**Supplementary Table S1.** Difference in reported VAS scores for endometriosis-related symptoms reported by women adhering to the dietary interventions and by women part of the control group.

| Symptoms associated with endometriosis | Intervention (Low FODMAP <sup>1</sup> or endometriosis diet) |                                   |                      | Control                          |                                   |                      |
|----------------------------------------|--------------------------------------------------------------|-----------------------------------|----------------------|----------------------------------|-----------------------------------|----------------------|
|                                        | N = 43                                                       |                                   |                      | N = 19                           |                                   |                      |
|                                        | Baseline VAS <sup>2</sup> score (median, IQR <sup>3</sup> )  | Six-month VAS score (median, IQR) | P-value <sup>4</sup> | Baseline VAS score (median, IQR) | Six-month VAS score (median, IQR) | P-value <sup>4</sup> |
| Dysmenorrhea                           | 5.0 (8.0)                                                    | 3.0 (6.0)                         | 0.083                | 4.0 (7.0)                        | 4.0 (7.0)                         | 0.634                |
| Deep dyspareunia                       | 4.0 (5.0)                                                    | 1.0 (4.0)                         | 0.012                | 3.5 (6.0)                        | 1.0 (6.0)                         | 0.424                |
| Chronic pelvic pain                    | 2.0 (6.0)                                                    | 3.0 (6.0)                         | 0.707                | 2.5 (6.0)                        | 2.0 (4.0)                         | 0.985                |
| Dysuria                                | 1.0 (4.0)                                                    | 0.0 (1.0)                         | 0.005                | 0.0 (3.0)                        | 0.0 (1.0)                         | 0.256                |
| Bloating                               | 8.0 (3.5)                                                    | 3.0 (4.0)                         | <0.001               | 6.0 (4.0)                        | 5.0 (5.0)                         | 0.487                |
| Tiredness                              | 7.0 (4.0)                                                    | 5.0 (3.0)                         | <0.001               | 7.0 (2.8)                        | 6.0 (6.0)                         | 0.200                |

  

| Symptoms associated with endometriosis | Low FODMAP diet                  |                                   |                      | Endometriosis diet               |                                   |                      |
|----------------------------------------|----------------------------------|-----------------------------------|----------------------|----------------------------------|-----------------------------------|----------------------|
|                                        | N = 22                           |                                   |                      | N = 21                           |                                   |                      |
|                                        | Baseline VAS score (median, IQR) | Six-month VAS score (median, IQR) | P-value <sup>4</sup> | Baseline VAS score (median, IQR) | Six-month VAS score (median, IQR) | P-value <sup>4</sup> |
| Dysmenorrhea                           | 4.0 (7.0)                        | 2.0 (4.0)                         | 0.111                | 6.0 (7.0)                        | 3.5 (7.0)                         | 0.298                |
| Deep dyspareunia                       | 4.5 (6.0)                        | 0.0 (4.0)                         | 0.066                | 4.0 (6.0)                        | 2.0 (5.0)                         | 0.078                |
| Chronic pelvic pain                    | 2.0 (6.0)                        | 4.0 (6.0)                         | 0.433                | 3.0 (6.0)                        | 2.5 (5.0)                         | 0.809                |
| Dysuria                                | 1.0 (3.0)                        | 0.0 (0.0)                         | 0.015                | 1.0 (4.5)                        | 0.0 (1.0)                         | 0.105                |
| Bloating                               | 8.0 (3.8)                        | 3.0 (4.5)                         | <0.001               | 7.0 (3.5)                        | 2.0 (3.0)                         | <0.001               |
| Tiredness                              | 7.0 (4.0)                        | 5.0 (5.0)                         | 0.087                | 7.0 (5.0)                        | 3.5 (2.8)                         | 0.002                |

Differences were calculated between baseline and 6-month follow-up.

<sup>1</sup> FODMAP: fermentable oligo-, di-, mono-saccharides, and polyols.

<sup>2</sup> VAS: visual analogue score (scale 0–10 cm).

<sup>3</sup> IQR: interquartile range.

<sup>4</sup> Calculated using the Mann–Whitney U test because of non-normal distributed data.
