# Supplementary material for: The effect of dietary interventions on pain and quality of life in women diagnosed with endometriosis: a prospective study with control group
Source: PubMed Central journal article supplement (PMC10754387; doi:10.1093/humrep/dead214), 2023-10-24
Supplement: dead214_supplementary_table_s3.pdf [file dead214_supplementary_table_s3.pdf]

**Supplementary Table S3.** Difference in QoL reported by women adhering to the dietary interventions and women part of the control group.

| Domains of quality of life measured using the EHP-30 <sup>2</sup> | Intervention (Low FODMAP <sup>1</sup> or endometriosis diet) |                                      |                      | Control                             |                                      |                      |
|-------------------------------------------------------------------|--------------------------------------------------------------|--------------------------------------|----------------------|-------------------------------------|--------------------------------------|----------------------|
|                                                                   | N = 43                                                       |                                      |                      | N = 19                              |                                      |                      |
|                                                                   | Baseline EHP-30 score (median, IQR <sup>3</sup> )            | Six-month EHP-30 score (median, IQR) | P-value <sup>4</sup> | Baseline EHP-30 score (median, IQR) | Six-month EHP-30 score (median, IQR) | P-value <sup>4</sup> |
| Pain                                                              | 42.0 (29.0)                                                  | 22.7 (37.5)                          | 0.005                | 28.4 (33.5)                         | 22.7 (25.0)                          | 0.302                |
| Powerlessness                                                     | 50.0 (30.2)                                                  | 16.7 (29.2)                          | <0.001               | 35.4 (31.3)                         | 29.2 (25.0)                          | 0.261                |
| Emotional wellbeing                                               | 33.3 (33.3)                                                  | 20.8 (32.3)                          | 0.003                | 31.3 (26.0)                         | 16.7 (25.0)                          | 0.156                |
| Social support                                                    | 34.4 (39.1)                                                  | 28.1 (31.3)                          | 0.150                | 43.8 (39.1)                         | 37.5 (18.8)                          | 0.884                |
| Self-image                                                        | 50.0 (43.8)                                                  | 25.0 (39.6)                          | <0.001               | 41.7 (27.1)                         | 25.0 (58.3)                          | 0.637                |
| Work life                                                         | 25.00 (40.0)                                                 | 5.0 (25.0)                           | 0.002                | 10.00 (15.0)                        | 10.0 (22.5)                          | 0.790                |
| Children                                                          | 0.0 (37.5)                                                   | 0.0 (9.4)                            | 0.265                | 0.0 (0.0)                           | 0.0 (0.0)                            | 0.794                |
| Sexual intercourse                                                | 45.0 (51.3)                                                  | 27.5 (47.5)                          | 0.023                | 50.0 (42.5)                         | 15.0 (75.0)                          | 0.156                |
| Medical profession                                                | 6.3 (37.5)                                                   | 12.5 (37.5)                          | 0.581                | 18.8 (37.5)                         | 40.6 (39.1)                          | 0.254                |
| Treatment                                                         | 41.7 (39.6)                                                  | 33.3 (41.7)                          | 0.250                | 33.3 (25.0)                         | 25.0 (66.7)                          | 0.831                |
| Infertility                                                       | 71.9 (32.8)                                                  | 56.3 (56.3)                          | 0.255                | 87.5 (31.3)                         | 81.3 (-)                             | 0.879                |

  

| Symptoms associated with endometriosis | Low FODMAP diet                     |                                      |                      | Endometriosis diet                  |                                      |                      |
|----------------------------------------|-------------------------------------|--------------------------------------|----------------------|-------------------------------------|--------------------------------------|----------------------|
|                                        | N = 22                              |                                      |                      | N = 21                              |                                      |                      |
|                                        | Baseline EHP-30 score (median, IQR) | Six-month EHP-30 score (median, IQR) | P-value <sup>4</sup> | Baseline EHP-30 score (median, IQR) | Six-month EHP-30 score (median, IQR) | P-value <sup>4</sup> |
| Pain                                   | 43.2 (28.4)                         | 15.9 (31.8)                          | 0.007                | 40.9 (37.5)                         | 22.7 (50.0)                          | 0.166                |
| Powerlessness                          | 54.2 (27.1)                         | 16.7 (37.5)                          | 0.002                | 45.8 (43.8)                         | 16.7 (35.4)                          | 0.014                |
| Emotional wellbeing                    | 37.5 (37.5)                         | 20.8 (37.5)                          | 0.073                | 33.3 (33.3)                         | 20.8 (27.1)                          | 0.022                |
| Social support                         | 31.3 (40.6)                         | 31.3 (50.0)                          | 0.723                | 37.5 (40.6)                         | 25.0 (34.4)                          | 0.126                |
| Self-image                             | 50.0 (50.0)                         | 33.3 (58.3)                          | 0.127                | 50.0 (37.5)                         | 16.7 (29.2)                          | <0.001               |
| Work life                              | 30.0 (40.0)                         | 5.0 (25.0)                           | 0.013                | 22.5 (38.8)                         | 5.0 (10.0)                           | 0.056                |
| Children                               | 0.0 (43.8)                          | 0.0 (0.0)                            | 0.389                | 0.0 (37.5)                          | 0.0 (18.8)                           | 0.451                |
| Sexual intercourse                     | 45.0 (50.0)                         | 30.0 (50.0)                          | 0.153                | 45.0 (47.5)                         | 20.0 (50.0)                          | 0.079                |
| Medical profession                     | 6.3 (37.5)                          | 12.5 (18.8)                          | 0.423                | 0.0 (43.8)                          | 6.3 (42.2)                           | 0.830                |
| Treatment                              | 25.0 (37.5)                         | 41.7 (37.5)                          | 0.924                | 50.0 (25.0)                         | 33.3 (25.0)                          | 0.023                |
| Infertility                            | 68.8 (-)                            | 56.3 (-)                             | 0.767                | 78.1 (-)                            | 56.3 (56.3)                          | 0.355                |

Differences were calculated between baseline and 6-month follow-up.

<sup>1</sup> FODMAP: fermentable oligo-, di-, mono-saccharides, and polyols.

<sup>2</sup> EHP-30 questionnaire: Endometriosis Health Profile 30 questionnaire (range 0–100).

<sup>3</sup> IQR: Interquartile Range.

<sup>4</sup> Calculated using the Mann–Whitney *U* test because of non-normal distributed data.
