# Supplementary material for: The effect of dietary interventions on pain and quality of life in women diagnosed with endometriosis: a prospective study with control group
Source: PubMed Central journal article supplement (PMC10754387; doi:10.1093/humrep/dead214), 2023-10-24
Supplement: dead214_supplementary_table_s4.pdf [file dead214_supplementary_table_s4.pdf]

**Supplementary Table S4.** Difference in gastro-intestinal quality of life, measured using the Gastro-Intestinal Quality of Life Index (GIQLI) reported by women adhering to the dietary interventions and women part of the control group.

| GIQLI score <sup>2,*</sup> | Intervention (Low FODMAP <sup>1,*</sup> or endometriosis diet) n = 43 |                                        |         | Control n = 19                        |                                        |         |
|----------------------------|-----------------------------------------------------------------------|----------------------------------------|---------|---------------------------------------|----------------------------------------|---------|
|                            | Baseline<br>GIQLI score<br>(mean, SD)                                 | Six-month<br>GIQLI score<br>(mean, SD) | P-value | Baseline<br>GIQLI score<br>(mean, SD) | Six-month<br>GIQLI score<br>(mean, SD) | P-value |
|                            | 127.35 (14.67)                                                        | 139.03 (11.09)                         | <0.001  | 134.29 (14.79)                        | 133.27 (13.82)                         | 0.570   |
|                            | Low FODMAP diet                                                       |                                        |         | Endometriosis diet                    |                                        |         |
|                            | N = 22                                                                |                                        |         | N = 21                                |                                        |         |
|                            | Baseline<br>GIQLI score<br>(mean, SD)                                 | Six-month<br>GIQLI score<br>(mean, SD) | P-value | Baseline<br>GIQLI score<br>(mean, SD) | Six-month<br>GIQLI score<br>(mean, SD) | P-value |
|                            | 122.68 (14.36)                                                        | 136.74 (9.81)                          | 0.001   | 132.24 (13.66)                        | 141.10 (11.86)                         | 0.029   |

Differences were calculated between baseline and 6-month follow-up. Differences were calculated using Mann–Whitney U test.

<sup>1</sup> FODMAP: fermentable oligo-, di-, mono-saccharides, and polyols.

<sup>2</sup> GIQLI: Gastro-Intestinal Quality of Life Index (range 0–144).
