# Supplementary material for: The effect of dietary interventions on pain and quality of life in women diagnosed with endometriosis: a prospective study with control group
Source: PubMed Central journal article supplement (PMC10754387; doi:10.1093/humrep/dead214), 2023-10-24
Supplement: dead214_supplementary_table_s5.pdf [file dead214_supplementary_table_s5.pdf]

**Supplementary Table S5.** Experiences on the appliance of their chosen diet, reported by participants adhering to either the Low FODMAP diet or endometriosis diet.

| Descriptives                                           | Low FODMAP <sup>1</sup> diet      |                              |                                      | Endometriosis diet          |                              |                            |
|--------------------------------------------------------|-----------------------------------|------------------------------|--------------------------------------|-----------------------------|------------------------------|----------------------------|
|                                                        | (N = 22)                          |                              |                                      | (N = 21)                    |                              |                            |
| <b>Previous dietary guidelines<sup>2</sup> (%)</b>     | 10 (45.5%)                        |                              |                                      | 12 (57.1%)                  |                              |                            |
| <b>Experience of the diet (%)</b>                      | <b>Three-week follow-up</b>       | <b>Six-month follow-up</b>   | <b>P-value</b>                       | <b>Three-week follow-up</b> | <b>Six-month follow-up</b>   | <b>P-value</b>             |
| Very easy                                              | 0 (0.0%)                          | 1 (4.5%)                     | <0.001                               | 0 (0.0%)                    | 1 (4.8%)                     | 0.017                      |
| Easy                                                   | 1 (4.5%)                          | 1 (4.5%)                     |                                      | 1 (4.8%)                    | 2 (9.5%)                     |                            |
| Normal                                                 | 5 (22.7%)                         | 10 (45.5%)                   |                                      | 8 (38.1%)                   | 11 (52.4%)                   |                            |
| Difficult                                              | 13 (59.1%)                        | 5 (22.7%)                    |                                      | 12 (57.1%)                  | 6 (28.6%)                    |                            |
| Very difficult                                         | 0 (0.0%)                          | 1 (4.5%)                     |                                      | 0 (0.0%)                    | 0 (0.0%)                     |                            |
| Unknown                                                | 3 (13.6%)                         | 4 (18.2%)                    |                                      | 0 (0%)                      | 2 (9.5%)                     |                            |
| <b>Difficulties experienced (%)</b>                    | <b>Three-week follow-up</b>       | <b>Six-month follow-up</b>   |                                      | <b>P-value</b>              | <b>Three-week follow-up</b>  |                            |
| Expensive                                              | 9 (%)                             | 4 (18.2%)                    | n/a                                  | 6 (%)                       | 4 (19.0%)                    | n/a                        |
| Time consuming                                         | 8 (%)                             | 6 (27.3%)                    |                                      | 5 (%)                       | 7 (33.3%)                    |                            |
| Complex                                                | 1 (%)                             | 4 (18.2%)                    |                                      | 3 (0%)                      | 2 (9.5%)                     |                            |
| Little social support                                  | 1 (%)                             | 1 (4.5%)                     |                                      | 3 (%)                       | 2 (9.5%)                     |                            |
| Little positive effects                                | 2 (%)                             | 1 (4.5%)                     |                                      | 0 (%)                       | 4 (19.0%)                    |                            |
| Other                                                  | 12 (57.1%)                        | 7 (31.8%)                    |                                      | 12 (%)                      | 10 (47.6%)                   |                            |
| <b>How often were exceptions made (%)</b>              | <b>Three-week follow-up</b>       | <b>Three-month follow-up</b> |                                      | <b>Six-month follow-up</b>  | <b>Three-week follow-up</b>  |                            |
| Every meal                                             | 0 (0.0%)                          | 0 (0.0%)                     | 0 (0%)                               | 0 (0.0%)                    | 2 (9.5%)                     | 1 (4.8%)                   |
| One meal a day                                         | 0 (0.0%)                          | 0 (0.0%)                     | 0 (0%)                               | 2 (9.5%)                    | 2 (9.5%)                     | 0 (0.0%)                   |
| One meal each 2–3 days                                 | 3 (13.6%)                         | 1 (4.5%)                     | 4 (18.2%)                            | 8 (38.1%)                   | 3 (14.3%)                    | 9 (42.9%)                  |
| One meal a week                                        | 4 (18.2%)                         | 6 (27.3%)                    | 5 (22.7%)                            | 3 (14.3%)                   | 9 (42.9%)                    | 7 (33.3%)                  |
| One meal every 2–3 weeks                               | 4 (18.2%)                         | 3 (13.6%)                    | 7 (31.8%)                            | 4 (19.1%)                   | 2 (9.5%)                     | 3 (14.3%)                  |
| One meal a month                                       | 1 (4.5%)                          | 4 (18.2%)                    | 1 (4.5%)                             | 2 (9.5%)                    | 1 (4.8%)                     | 0 (0.0%)                   |
| Never                                                  | 7 (31.8%)                         | 5 (22.7%)                    | 0 (0%)                               | 2 (9.5%)                    | 2 (9.5%)                     | 0 (0.0%)                   |
| Unknown                                                | 2 (9.1%)                          | 3 (13.6%)                    | 5 (22.7%)                            | 0 (0.0%)                    | 0 (0.0%)                     | 1 (4.8%)                   |
| <b>Exception meals (%)</b>                             | <b>Three-week follow-up</b>       | <b>Three-month follow-up</b> | <b>Six-month follow-up</b>           | <b>Three-week follow-up</b> | <b>Three-month follow-up</b> | <b>Six-month follow-up</b> |
| Main meal                                              | 7 (31.8%)                         | 8 (36.4%)                    | 11 (50.0%)                           | 6 (28.6%)                   | 5 (23.8%)                    | 9 (42.9%)                  |
| Snacks                                                 | 2 (9.1%)                          | 5 (22.7%)                    | 1 (4.5%)                             | 6 (28.6%)                   | 4 (19.1%)                    | 3 (14.3%)                  |
| Both                                                   | 2 (9.1%)                          | 1 (4.5%)                     | 3 (13.6%)                            | 7 (33.3%)                   | 10 (47.6%)                   | 8 (38.1%)                  |
| Unknown                                                | 11 (50.0%)                        | 8 (36.4%)                    | 7 (31.8%)                            | 2 (9.5%)                    | 2 (9.5%)                     | 1 (4.8%)                   |
| <b>Number of dropouts<sup>3</sup>(%)</b>               |                                   |                              |                                      |                             |                              |                            |
| After 3 weeks                                          |                                   | 0 (0%)                       |                                      |                             | 1 (4.8%)                     |                            |
| After 6 weeks                                          |                                   | 2 (9.1%)                     |                                      |                             | 0 (0%)                       |                            |
| After 9 weeks                                          |                                   | 0 (0%)                       |                                      |                             | 0 (0%)                       |                            |
| After 12 weeks                                         |                                   | 0 (0%)                       |                                      |                             | 0 (0%)                       |                            |
| <b>Continuing the diet at the end of follow-up (%)</b> |                                   |                              |                                      |                             |                              |                            |
| Yes                                                    |                                   | 17 (77.3%)                   |                                      |                             | 15 (71.4%)                   |                            |
| Partially                                              |                                   | 1 (4.5%)                     |                                      |                             | 2 (9.5%)                     |                            |
| No                                                     |                                   | 1 (4.5%)                     |                                      |                             | 4 (19.1%)                    |                            |
| Unknown                                                |                                   | 3 (13.6%)                    |                                      |                             | 0 (0.0%)                     |                            |
| <b>Patient satisfaction (mean, SD)</b>                 | <b>Low FODMAP diet<br/>N = 22</b> |                              | <b>Endometriosis diet<br/>N = 21</b> |                             | <b>P-value</b>               |                            |
| Taken serious by dietician                             | 9.95 (0.23)                       |                              | 9.95 (0.22)                          |                             | n/a                          |                            |
| Expertise dietician                                    | 9.63 (0.68)                       |                              | 9.76 (0.54)                          |                             | n/a                          |                            |
| Shared decision making                                 | 9.42 (1.07)                       |                              | 9.71 (0.56)                          |                             | n/a                          |                            |
| Negotiability of progress                              | 9.37 (1.07)                       |                              | 9.76 (0.54)                          |                             | n/a                          |                            |
| Information provision                                  | 9.47 (0.77)                       |                              | 9.71 (0.56)                          |                             | n/a                          |                            |
| Accessibility dietician                                | 9.79 (0.54)                       |                              | 9.76 (0.63)                          |                             | n/a                          |                            |
| Self-reported effect of diet                           | 9.26 (0.81)                       |                              | 9.10 (0.89)                          |                             | 0.667                        |                            |
| Recommend diet to others                               | 9.37 (1.30)                       |                              | 9.24 (1.00)                          |                             | n/a                          |                            |

<sup>1</sup> FODMAP: fermentable oligo-, di-, mono-saccharides, and polyols.

<sup>2</sup> Previous dietary guidelines such as eating vegetarian, vegan, halal, kosher gluten-, or lactose-free.

<sup>3</sup> All women dropped out because of personal reasons such as moving to a foreign country or an illness in the family.
